## Erratum

**M. Kawakami and N. Nakanishi** (2001). The role of an endogenous PKA inhibitor PKI $\alpha$  in organizing left-right axis formation. *Development* **128**, 2509-2515.

The affiliation given for these two authors in the printed version of the journal is incorrect.

Both authors were also working at Harvard Medical School, Department of Neurobiology, Boston, MA 02115, USA.

We apologise to the authors and readers for this mistake.
